# Supplementary material
Source: Research Square preprint supplement (doi:10.21203/rs.3.rs-9087690/v1)
Supplement: Supplementary file 1 [file 6f8e71e02aca011200ee06d5.docx]

Supplementary Table S2. Concomitant therapies prior to and with Cytopoint treatment

| Therapy Category | Pre-Cytopoint (Day 0) Examples (Count) | With Cytopoint Day 91 Examples (Count) | % Reduction |
| --- | --- | --- | --- |
| Shampoos | Malaseb, Douxo Calm, Douxo Chlorhex, Relief, Oatmeal, Medicated, Claritin shampoo (7) | Douxo Calm, Douxo, Malaseb, Relief (3) | ≈57% |
| Topicals/Ointments | Otomax, Posatex, Mometamax, Dermavet ointment, Neosporin, Mupirocin, PS pads, Mal-a-ket wipes (8) | Dermavet ointment, Mupirocin, PS pads, Mal-a-ket wipes (4) | ≈50% |
| Systemic anti-pruritics/antihistamines | Apoquel, Temaril-P, Benadryl, Zyrtec, Cetirizine, Antihistamines (6) | Apoquel, Antihistamine (2) | ≈67% |
| Systemic antimicrobials | Cephalexin, Convenia, Simplicef, Ketoconazole, Ofloxacin, Chloramphenicol (6) | Cephalexin, Convenia, Simplicef, Ketoconazole, Ofloxacin, Chloramphenicol (6) | 0% |
| Supplements/Diets | Dinovite, Z/D food, Derm Defense dog food, Coconut oil (4) | Z/D food, Derm Defense dog food, Coconut oil (3) | ≈25% |
| Overall | ≈28 therapies | ≈11 therapies | ≈60.7% fewer therapies |

Footnote: Numbers reflect distinct therapies recorded at Day 0 versus Day 91 as summarized from study documentation..
