# Supplementary material
Source: Research Square preprint supplement (doi:10.21203/rs.3.rs-9087690/v1)
Supplement: Supplementary file 2 [file b7b207bfa1de0a504cbc6ab0.pdf]

# The Canine Dermatitis Quality of Life Questionnaire

Thank you for taking the time to answer the following questions. The information gathered will help us to get a better understanding of your dog's skin condition and any treatments they are receiving. Thinking about your dog **over the past 24 hours**, please answer each question using the response options provided (strongly disagree to strongly agree). **Please choose only one answer for each statement.**

|                                       |                                                                                                                                      |                                   |                                   |                       |                       |
|---------------------------------------|--------------------------------------------------------------------------------------------------------------------------------------|-----------------------------------|-----------------------------------|-----------------------|-----------------------|
| <b>Domain: Canine Quality of Life</b> | <b>1. Thinking about <u>the past 24 hours</u>...Overall, my dog is healthy.</b>                                                      |                                   |                                   |                       |                       |
|                                       | <b>Strongly disagree</b>                                                                                                             | <b>Disagree</b>                   | <b>Neither agree nor disagree</b> | <b>Agree</b>          | <b>Strongly agree</b> |
|                                       | <b>2. Thinking about <u>the past 24 hours</u>...My dog is happy and content.</b>                                                     |                                   |                                   |                       |                       |
|                                       | <b>Strongly disagree</b>                                                                                                             | <b>Disagree</b>                   | <b>Neither agree nor disagree</b> | <b>Agree</b>          | <b>Strongly agree</b> |
|                                       | <b>3. Thinking about <u>the past 24 hours</u>...My dog is active.</b>                                                                |                                   |                                   |                       |                       |
|                                       | <b>Strongly disagree</b>                                                                                                             | <b>Disagree</b>                   | <b>Neither agree nor disagree</b> | <b>Agree</b>          | <b>Strongly agree</b> |
|                                       | <b>4. Thinking about <u>the past 24 hours</u>...My dog sleeps well.</b>                                                              |                                   |                                   |                       |                       |
| <b>Domain: Owner Quality of Life</b>  | <b>5. Thinking about <u>the past 24 hours</u>...My dog's skin condition negatively affects my normal family life.</b>                |                                   |                                   |                       |                       |
|                                       | <b>Strongly disagree</b>                                                                                                             | <b>Disagree</b>                   | <b>Neither agree nor disagree</b> | <b>Agree</b>          | <b>Strongly agree</b> |
|                                       | <b>6. Thinking about <u>the past 24 hours</u>...It is challenging to let others look after my dog because of the skin condition.</b> |                                   |                                   |                       |                       |
|                                       | <b>Strongly disagree</b>                                                                                                             | <b>Disagree</b>                   | <b>Neither agree nor disagree</b> | <b>Agree</b>          | <b>Strongly agree</b> |
|                                       | <b>7. Thinking about <u>the past 24 hours</u>...My dog's scratching, licking, biting, or chewing wakes me up at night.</b>           |                                   |                                   |                       |                       |
|                                       | <b>Strongly disagree</b>                                                                                                             | <b>Disagree</b>                   | <b>Neither agree nor disagree</b> | <b>Agree</b>          | <b>Strongly agree</b> |
|                                       | <b>8. Thinking about <u>the past 24 hours</u>...My dog's skin condition makes me sad.</b>                                            |                                   |                                   |                       |                       |
| <b>Strongly disagree</b>              | <b>Disagree</b>                                                                                                                      | <b>Neither agree nor disagree</b> | <b>Agree</b>                      | <b>Strongly agree</b> |                       |

Domain: Treatment satisfaction (Injection or tablet)

|                                                                                                                                                                                                                                         |          |                            |       |                |
|-----------------------------------------------------------------------------------------------------------------------------------------------------------------------------------------------------------------------------------------|----------|----------------------------|-------|----------------|
| 9. I am satisfied with my dog's most recently prescribed skin treatment (injection or tablet only).                                                                                                                                     |          |                            |       |                |
| Strongly disagree                                                                                                                                                                                                                       | Disagree | Neither agree nor disagree | Agree | Strongly agree |
| 10. I am confident that my dog's most recently prescribed skin treatment is effective (injection or tablet only).                                                                                                                       |          |                            |       |                |
| Strongly disagree                                                                                                                                                                                                                       | Disagree | Neither agree nor disagree | Agree | Strongly agree |
| 11. I am willing to continue with my dog's most recently prescribed skin treatment long term (injection or tablet only).                                                                                                                |          |                            |       |                |
| Strongly disagree                                                                                                                                                                                                                       | Disagree | Neither agree nor disagree | Agree | Strongly agree |
| <p>My dog has experienced side effects from the most recently prescribed skin treatment (injection or tablet only).</p> <ul style="list-style-type: none"> <li>• Yes (go to question 12.)</li> <li>• No (go to question 13.)</li> </ul> |          |                            |       |                |
| 12. My dog has experienced tolerable side effects from my dog's most recently prescribed skin treatment (injection or tablet only).                                                                                                     |          |                            |       |                |
| Strongly disagree                                                                                                                                                                                                                       | Disagree | Neither agree nor disagree | Agree | Strongly agree |
| 13. I find it easy to fit my dog's most recently prescribed skin treatment into my schedule (injection or tablet only).                                                                                                                 |          |                            |       |                |
| Strongly disagree                                                                                                                                                                                                                       | Disagree | Neither agree nor disagree | Agree | Strongly agree |
| 14. I am satisfied with how often my dog receives the most recently prescribed skin treatment (injection or tablet only).                                                                                                               |          |                            |       |                |
| Strongly disagree                                                                                                                                                                                                                       | Disagree | Neither agree nor disagree | Agree | Strongly agree |
| 15. I am satisfied with the way my dog's most recently prescribed skin treatment is given (injection or tablet only).                                                                                                                   |          |                            |       |                |
| Strongly disagree                                                                                                                                                                                                                       | Disagree | Neither agree nor disagree | Agree | Strongly agree |

|                                                                                                                                     |                                                                                                                                               |                                   |                                   |                       |                       |  |
|-------------------------------------------------------------------------------------------------------------------------------------|-----------------------------------------------------------------------------------------------------------------------------------------------|-----------------------------------|-----------------------------------|-----------------------|-----------------------|--|
|                                                                                                                                     | <b>16. My dog's most recently prescribed skin treatment is worth the financial cost (injection or tablet only).</b>                           |                                   |                                   |                       |                       |  |
|                                                                                                                                     | <b>Strongly disagree</b>                                                                                                                      | <b>Disagree</b>                   | <b>Neither agree nor disagree</b> | <b>Agree</b>          | <b>Strongly agree</b> |  |
| <b>Is your dog currently receiving any topical skin treatments for the skin condition (for example, creams and medicated baths)</b> |                                                                                                                                               |                                   |                                   |                       |                       |  |
| <ul style="list-style-type: none"> <li>• Yes (go to question 17.)</li> <li>• No (end of questionnaire)</li> </ul>                   |                                                                                                                                               |                                   |                                   |                       |                       |  |
| <b>Domain: Treatment satisfaction (Topical)</b>                                                                                     | <b>17. I am satisfied with my dog's topical skin treatment (for example, creams and medicated baths).</b>                                     |                                   |                                   |                       |                       |  |
|                                                                                                                                     | <b>Strongly disagree</b>                                                                                                                      | <b>Disagree</b>                   | <b>Neither agree nor disagree</b> | <b>Agree</b>          | <b>Strongly agree</b> |  |
|                                                                                                                                     | <b>18. I am confident that my dog's topical skin treatment is effective (for example, creams and medicated baths).</b>                        |                                   |                                   |                       |                       |  |
|                                                                                                                                     | <b>Strongly disagree</b>                                                                                                                      | <b>Disagree</b>                   | <b>Neither agree nor disagree</b> | <b>Agree</b>          | <b>Strongly agree</b> |  |
|                                                                                                                                     | <b>19. I am willing to continue with my dog's topical skin treatment long term (for example, creams and medicated baths).</b>                 |                                   |                                   |                       |                       |  |
|                                                                                                                                     | <b>Strongly disagree</b>                                                                                                                      | <b>Disagree</b>                   | <b>Neither agree nor disagree</b> | <b>Agree</b>          | <b>Strongly agree</b> |  |
|                                                                                                                                     | <b>My dog has experienced side effects from my dog's topical skin treatment (for example, creams and medicated baths).</b>                    |                                   |                                   |                       |                       |  |
|                                                                                                                                     | <ul style="list-style-type: none"> <li>• Yes (go to question 20.)</li> <li>• No (go to question 21.)</li> </ul>                               |                                   |                                   |                       |                       |  |
|                                                                                                                                     | <b>20. My dog has experienced tolerable side effects from my dog's topical skin treatment (for example, creams and medicated baths).</b>      |                                   |                                   |                       |                       |  |
|                                                                                                                                     | <b>Strongly disagree</b>                                                                                                                      | <b>Disagree</b>                   | <b>Neither agree nor disagree</b> | <b>Agree</b>          | <b>Strongly agree</b> |  |
|                                                                                                                                     | <b>21. I find it easy to fit my dog's most recently prescribed skin treatment into my schedule (for example, creams and medicated baths).</b> |                                   |                                   |                       |                       |  |
| <b>Strongly disagree</b>                                                                                                            | <b>Disagree</b>                                                                                                                               | <b>Neither agree nor disagree</b> | <b>Agree</b>                      | <b>Strongly agree</b> |                       |  |

|                                                                                                                                              |                 |                                   |              |                       |
|----------------------------------------------------------------------------------------------------------------------------------------------|-----------------|-----------------------------------|--------------|-----------------------|
| <b>22. I am satisfied with the number of times my dog receives the topical treatment each day (for example, creams and medicated baths).</b> |                 |                                   |              |                       |
| <b>Strongly disagree</b>                                                                                                                     | <b>Disagree</b> | <b>Neither agree nor disagree</b> | <b>Agree</b> | <b>Strongly agree</b> |
| <b>23. I am satisfied with the way my dog's topical skin treatment is given (for example creams and medicated baths).</b>                    |                 |                                   |              |                       |
| <b>Strongly disagree</b>                                                                                                                     | <b>Disagree</b> | <b>Neither agree nor disagree</b> | <b>Agree</b> | <b>Strongly agree</b> |
| <b>24. My dog's topical skin treatment is worth the financial cost (for example, creams and medicated baths).</b>                            |                 |                                   |              |                       |
| <b>Strongly disagree</b>                                                                                                                     | <b>Disagree</b> | <b>Neither agree nor disagree</b> | <b>Agree</b> | <b>Strongly agree</b> |

Thinking about your dog **right now**, please answer each question using the response options provided (extremely poor to excellent). **Please choose only one answer for each statement.**

|                                                                                                                                            |                  |             |             |             |                  |                  |
|--------------------------------------------------------------------------------------------------------------------------------------------|------------------|-------------|-------------|-------------|------------------|------------------|
| <b>1. Thinking about your dog's skin condition, select the box that best describes <b>your dog's</b> quality of life <b>right now</b>.</b> |                  |             |             |             |                  |                  |
| <b>Extremely Poor</b>                                                                                                                      | <b>Very Poor</b> | <b>Poor</b> | <b>Fair</b> | <b>Good</b> | <b>Very Good</b> | <b>Excellent</b> |
| <b>2. Thinking about your dog's skin condition, select the box that best describes <b>your</b> quality of life <b>right now</b>.</b>       |                  |             |             |             |                  |                  |
| <b>Extremely Poor</b>                                                                                                                      | <b>Very Poor</b> | <b>Poor</b> | <b>Fair</b> | <b>Good</b> | <b>Very Good</b> | <b>Excellent</b> |
