# Supplementary material
Source: Research Square preprint supplement (doi:10.21203/rs.3.rs-9087690/v1)
Supplement: Supplementary file 3 [file f4499316bc922cacdc34affb.docx]

Supplementary Table S1. Demographic characteristics of dogs enrolled in the study

| Characteristic | Summary |
| --- | --- |
| Age (years) | Mean: 7.18, Median: 7, Range: 1–19, SD: 4.26 |
| Weight (kg) | Mean: 24.28, Median: 23.2, Range: 5.5–70.5, SD: 15.85 |
| Sex / Neuter status | FS: 28, MN: 20, M (intact): 2, F (intact): 1 |
| Most common breeds | Labrador Retriever (n=5), Pitbull mix (n=3), Dachshund mix (n=3), French Bulldog (n=3), Golden Retriever (n=2), Yorkshire Terrier (n=2), German Shepherd (n=2), Shih Tzu (n=2), Labrador Retriever mix (n=2), Others (n=1 each) |
